# Supplementary material
Source: publisher figshare collection journal article supplement (https://gsapubs.figshare.com/ndownloader/files/23308910)
Supplement: Supplementary file 1 [file 23308910]

Umhoefer et al., 2018, Breaching of strike-slip faults and successive flooding of pull-apart basins to form the Gulf of California seaway from ca. 8–6 Ma: *Geology*, <https://doi.org/10.1130/G40242.1>.

Supplemental File

**TECTONIC RECONSTRUCTION METHODOLOGY**

The foundation of our model for sequential breaching of pull-apart basins in the Gulf of California is a series of GIS-based palinspastic reconstruction maps of the Gulf of California–Salton Trough (GCAST) oblique rift. This GCAST reconstruction model is based on a synthesis of numerous datasets for crustal deformation over the past 11 Myr along a ~2,000 km-long, 400–500 km-wide swath of the Pacific–North America plate boundary, from San Bernardino, California (United States) to Puerto Vallarta, Jalisco (México). The study region is divided into discrete tectonic blocks (n=310) based on geologic, fault, geophysical, bathymetric, and topographic data. Spreading center and fault slip rates were acquired from available geologic data, cross-Gulf tie points, GPS studies, and seafloor magnetic data. These data serve as inputs for our GIS-based tectonic reconstruction, which sequentially restores crustal deformation between tectonic blocks in 1 Myr increments.

**Regional Model Constraints**

The GCAST reconstruction incorporates fundamental constraints on the magnitude and direction of Pacific–North America relative dextral-oblique motion provided by an updated global plate-circuit model (Atwater and Stock, 1998, 2013). Modern geodetic studies indicate that ~93% of modern-day Pacific–North America (PAC–NAM) plate motion is localized between

the Baja California microplate (BCM) and NAM (Plattner et al., 2007) and suggest that the Baja California microplate (BCM) has never been completely coupled to the Pacific plate (Dixon et al., 2000). BCM-NAM geodetic rates also agree with the rates derived from documented offsets of late Miocene geologic tie points across the Gulf of California (e.g., Oskin et al, 2001; Oskin and Stock, 2003) and are incorporated in GCAST reconstruction steps back to 6 Ma. Thus, our preferred GCAST reconstruction uses 93% BCM-PAC coupling from the present back to 6 Ma. We assume BCM-PAC coupling of 60% between 6 and 7 Ma, and 25% between 7 and 11 Ma, to avoid unacceptable overlap of continental crustal blocks between Baja California and the Sierra Madre Occidental (on stable NAM). Using these coupling ratios and PAC-NAM stage Euler poles, we determine the azimuth and velocity of individual points on the BCM relative to NAM in 1 million year increments back to 11 Ma. This procedure accounts for minor clockwise rotation of BCM that occurred during oblique rifting, and shows how total BCM-NAM relative motion increases from north to south due to greater distance from the Euler pole.

### **Local Model Constraints**

At a more local scale, the GCAST model attempts to incorporate all published information about the geometry, timing, and magnitude of late Miocene to present crustal deformation, including contemporary deformation rates from GPS studies (e.g., Meade and Hager, 2005; Plattner et al., 2007), the location, timing, style, and magnitude of late Cenozoic faulting from geologic and marine geophysical studies (e.g., Howard and Miller, 1992; Richard, 1993; Umhoefer et al., 2002; Aragon-Arreola and Martin-Barajas, 2007; Guest et al., 2007; Lease et al., 2009; Kluesner, 2011; Bennett et al., 2016), information about crustal structure from magnetic and gravity studies (e.g., Sandwell and Smith, 2009), estimates of the age and width of

new oceanic crust in the Gulf of California (e.g., Lizarralde et al., 2007; Martín-Barajas et al., 2013), and unique geologic formations that serve as strain markers across the Pacific–North America plate boundary (e.g., Crowell, 1962; Gastil et al., 1973; Powell, 1993; Matti and Morton, 1993; Oskin et al., 2001; Oskin and Stock, 2003; Darin and Dorsey, 2013). Our 7 Ma reconstruction was compared to the seismic reflection study of the early Guaymas salt basin by Miller and Lizarralde (2013).

Fine-scale restoration of tectonic blocks along significant ( $>1$  km offset) faults, across extensional (e.g. pull-apart and half-graben) basins, and by vertical-axis rotation is accomplished using a custom, open-source “Tectonic Reconstruct” ArcGIS add-in tool (<https://astrogeology.usgs.gov/facilities/mrctr/gis-tools>). The “Tectonic Reconstruct” tool takes a set of polygons depicting present day locations of tectonic blocks and sequentially restores displacement of their centroids along a vector specific to each time increment. The tool also allowed us to partition strain where appropriate into two components of strike-slip and normal motion. In the northern portion of the GCAST reconstructions in the Salton trough and northern Gulf of California regions, published onshore studies provide constraints for the incremental offset of many tectonic blocks. In the central to southern Gulf of California, most of the tectonic blocks are partially exposed as islands or more commonly fully submerged beneath the Gulf. Only a small number of these blocks have seismic data that constrain offsets between them. Therefore, in that portion of the GCAST reconstructions, we proportioned the total BCM–NAM relative motion with increasing offsets moving from the rift escarpment to the spreading centers as follows: we assigned lesser offset to coastal and near shore blocks, intermediate offset to submerged and island blocks of thinned continental crust, and large offset to ultra-thinned continental crustal blocks near the spreading centers.

67

## 68 **EARLIEST MARINE DEPOSITS IN THE GULF OF CALIFORNIA**

69       Numbered references in Figures 2 and 3 refer to the following published studies which  
70 provide age constraints for the earliest marine strata in the Gulf of California: 1 – McCloy et al.,  
71 1988; 2 – Martínez-Gutiérrez and Sethi, 1997; 3 – Miller and Lizarralde, 2013; 4 – Holt et al.,  
72 2000; 5 – Bennett et al., 2015; 6 – Delgado-Argote et al., 2000; 7 – Martín-Barajas et al., 1997; 8  
73 – Boehm, 1984; 9 – Martín-Barajas et al., 2001; 10 – Dorsey et al., 2007; 11 – Dorsey et al.,  
74 2018; 12 – McDougall et al., 1999.

75

## 76 **REFERENCES CITED**

77 Aragón-Arreola, M., and Martín-Barajas, A., 2007, Westward migration of extension in the  
78 northern Gulf of California, Mexico: *Geology*, v. 35, no. 6, p. 571–574,  
79 doi:10.1130/G23360A.1.

80 Atwater, T., and Stock, J., 1998, Pacific North America plate tectonics of the Neogene  
81 southwestern United States: An update: *International Geology Review*, v. 40, no. 5, p.  
82 375–402, doi:10.1080/00206819809465216.

83 Atwater, T. and Stock, J., 2013, Constraints on the history of the Late Cenozoic Pacific-North  
84 American plate boundary from marine magnetic anomalies and global plate circuits:  
85 *Geological Society of America Abstracts with Programs*. v. 45, no. 6, p. 21.

86 Bennett, S.E.K., Oskin, M.E., Iriondo, A., and Kunk, M.J., 2016, Slip history of the La Cruz  
87 fault: development of a late Miocene transform in response to increased rift obliquity in  
88 the northern Gulf of California: *Tectonophysics*, v. 693, p. 409–435,  
89 doi:10.1016/j.tecto.2016.06.013.

90 Boehm, M.C., 1984, An overview of the lithostratigraphy, biostratigraphy, and

paleoenvironments of the late Neogene San Felipe Marine Sequence, Baja California, Mexico, in Frizzell, V.A., ed., *Geology of the Baja California Peninsula: Pacific Section*, Society of Economic Paleontologists and Mineralogists Book 39, p. 253–265.

Crowell, J.C., 1962, Displacement along the San Andreas Fault, California: *Geological Society of America Special Papers*, v. 71, p. 1–58.

Darin, M.H., and Dorsey, R.J., 2013, Reconciling disparate estimates of total offset on the southern San Andreas Fault: *Geology*, v. 41, no. 9, p. 975–978, doi:10.1130/G34276.1.

Delgado-Argote, L.A., López-Martínez, M., and Perrilliat, M.C., 2000, Geologic reconnaissance and Miocene age of volcanism and associated fauna from sediments of Bahia de Los Angeles, Baja California, central Gulf of California, in Stock, J., et al., eds., *Cenozoic tectonics and volcanism of Mexico: Geological Society of America Special Paper 334*, p. 111–121, doi: 10.1130/0-8137-2334-5.111.

Dixon, T., Farina, F., DeMets, C., Suarez-Vidal, F., Fletcher, J., Marquez-Azua, B., Miller, M., Sanchez, O., and Umhoefer, P., 2000, New kinematic models for Pacific–North America Motion from 3 Ma to Present, II: Evidence for a “Baja California Shear Zone”: *Geophysical Research Letters*, v. 27, no. 23, p. 3961–3964, doi:10.1029/2000GL008529.

Gastil, R.G., Lemone, D.V., and Stewart, W.J., 1973, Permian fusulinids from near San Felipe, Baja California: *American Association of Petroleum Geologists Bulletin*, v. 57, p. 746–747.

Guest, B., Niemi, N., and Wernicke, B., 2007, Stateline fault system: A new component of the Miocene-Quaternary Eastern California shear zone: *Geological Society of America Bulletin*, v. 119, no. 11–12, p. 1337–1347, doi:10.1130/0016-7606(2007)119[1337:SFSANC]2.0.CO;2.

114 Howard, K.A., and Miller, D.M., 1992, Late Cenozoic faulting at the boundary between the  
 115 Mojave and Sonoran blocks; Bristol Lake area, California, *in* Richard, S.M., ed.,  
 116 Deformation associated with the Neogene, eastern California shear zone, southeastern  
 117 California and southwestern Arizona; proceedings: Redlands, California, San Bernardino  
 118 County Museum Association, San Bernardino County Museum Association Special  
 119 Publication 92–1, p. 37–47.

120 Kluesner, J.W., 2011, Marine geophysical study of cyclic sedimentation and shallow sill  
 121 intrusion in the floor of the Central Gulf of California [Ph.D. Dissertation]: University of  
 122 California, San Diego, 213 pp.

123 Lease, R.O., McQuarrie, N., Oskin, M., and Leier, A., 2009, Quantifying dextral shear on the  
 124 Bristol-Granite Mountains fault zone: successful geologic prediction from kinematic  
 125 compatibility of the eastern California shear zone: *The Journal of Geology*, v. 117, p. 37–  
 126 53.

127 Lizarralde, D., Axen, G.J., Brown, H.E., Fletcher, J. M., Gonzalez-Fernandez, A., Harding, A. J.,  
 128 Holbrook, W. S., Kent, G. M., Paramo, P., Sutherland, F., and Umhoefer, P. J., 2007,  
 129 Variation in styles of rifting in the Gulf of California: *Nature*, v. 448, no. 7152, p. 466–  
 130 469, doi:10.1038/nature06035.

131 Martín-Barajas, A., González-Escobar, M., Fletcher, J.M., Pacheco, M., Oskin, M., and Dorsey,  
 132 R., 2013, Thick deltaic sedimentation and detachment faulting delay the onset of  
 133 continental rupture in the northern Gulf of California: Analysis of seismic reflection  
 134 profiles: *Tectonics*, v. 32, p. 1294–1311, doi:10.1002 /tect .20063.

135 Matti, J.C., and Morton, D.M., 1993, Paleogeographic evolution of the San Andreas fault in

southern California: A reconstruction based on a new cross-fault correlation, *in* Powell, R.E., et al., eds., The San Andreas fault system: Displacement, palinspastic reconstruction, and geologic evolution: Geological Society of America Memoir 178, p. 107–159.

Meade, B.J., and Hager, B.H., 2005, Block models of crustal motion in southern California constrained by GPS measurements: *Journal of Geophysical Research: Solid Earth*, v. 110, no. B03403, 19 p., doi:10.1029/2004JB003209.

Miller, N.C., and Lizarralde, D., 2013, Thick evaporites and early rifting in the Guaymas Basin, Gulf of California: *Geology*, v. 41, p. 283–286, doi: 10.1130/G33747.1 .

Oskin, M., Stock, J., and Martín-Barajas, A., 2001, Rapid localization of Pacific-North America plate motion in the Gulf of California: *Geology*, v. 29, no. 5, p. 459–462.

Oskin, M., and Stock, J., 2003, Pacific–North America plate motion and opening of the Upper Delfin basin, northern Gulf of California, Mexico: *Geological Society of America Bulletin*, v. 115, no. 10, p. 1173-1190.

Plattner, C., Malservisi, R., Dixon, T.H., LaFemina, P., Sella, G.F., Fletcher, J.M., and Suarez-Vidal, F., 2007, New constraints on relative motion between the Pacific plate and Baja California microplate (México) from GPS measurements: *Geophysical Journal International*, v. 170, p. 1373–1380, doi:10.1111/j.1365-246X.2007.03494.x.

Powell, R.E., 1993, Balanced palinspastic reconstruction of pre-late Cenozoic paleogeology, southern California: Geologic and kinematic constraints on evolution of the San Andreas Fault system, *in* Powell, R.E., et al., eds., The San Andreas Fault system: Displacement, palinspastic reconstruction, and geologic evolution: Geological Society of America Memoir 178, p. 1–106.

159 Richard, S.M., 1993, Palinspastic reconstruction of southeastern California and southwestern  
160 Arizona for the middle Miocene: *Tectonics*, v. 12, no. 4, p. 830–854.

161 Sandwell, D.T., and Smith, W.H., 2009, Global marine gravity from retracked Geosat and ERS1  
162 altimetry: Ridge segmentation versus spreading rate: *Journal of Geophysical Research:*  
163 *Solid Earth*, v. 114, no. B1.

164 Umhoefer, P.J., Mayer, L., Dorsey, R.J., 2002, Evolution of the margin of the Gulf of California,  
165 Baja California Peninsula, México: *Geological Society of America Bulletin*, v. 114, no. 7,  
166 p. 849–868.
